# Supplementary material for: A room temperature ammonia gas sensor based on cerium oxide/MXene and self-powered by a freestanding-mode triboelectric nanogenerator and its multifunctional monitoring application
Source: Royal Society of Chemistry journal article supplement (doi:10.1039/d2ta07917h), 2023-01-01
Supplement: d2ta07917h3.pdf [file d2ta07917h3.pdf]

# **Room Temperature Ammonia Gas Sensor Based on Cerium oxide/Mxene and Self-powered by Freestanding-mode Triboelectric Nanogenerator and its Multifunctional Monitoring Application**

**Xingwei Wang<sup>a,b,1</sup>, Likun Gong<sup>c,d,1</sup>, Zheng Li<sup>a</sup>, Yingda Yin<sup>e</sup>, Dongzhi Zhang<sup>a\*</sup>**

<sup>a</sup> College of Control Science and Engineering, China University of Petroleum (East China), Qingdao, Shandong, 266580, China

<sup>b</sup> School of Environment, Tsinghua University, Beijing, 100084, China;

<sup>c</sup> CA Center for Excellence in Nanoscience, Beijing Key Laboratory of Micro-Nano Energy and Sensor, Beijing Institute of Nanoenergy and Nanosystems, Chinese Academy of Sciences, Beijing 101400, China

<sup>d</sup> School of Nanoscience and Technology, University of Chinese Academy of Sciences, Beijing 100049, China

<sup>e</sup> School of Precision Instruments and Optoelectronics Engineering, Department of Precision Instrument Engineering, State Key Laboratory of Precision Measuring Technology and Instruments, Tianjin University, Tianjin, 300072, China

\*Corresponding author: Dongzhi Zhang

<sup>1</sup>Both the authors contributed equally to this work.

E-mail address: [dzzhang@upc.edu.cn](mailto:dzzhang@upc.edu.cn) Tel: +86-532-86982928 Fax: +86-532-86983326

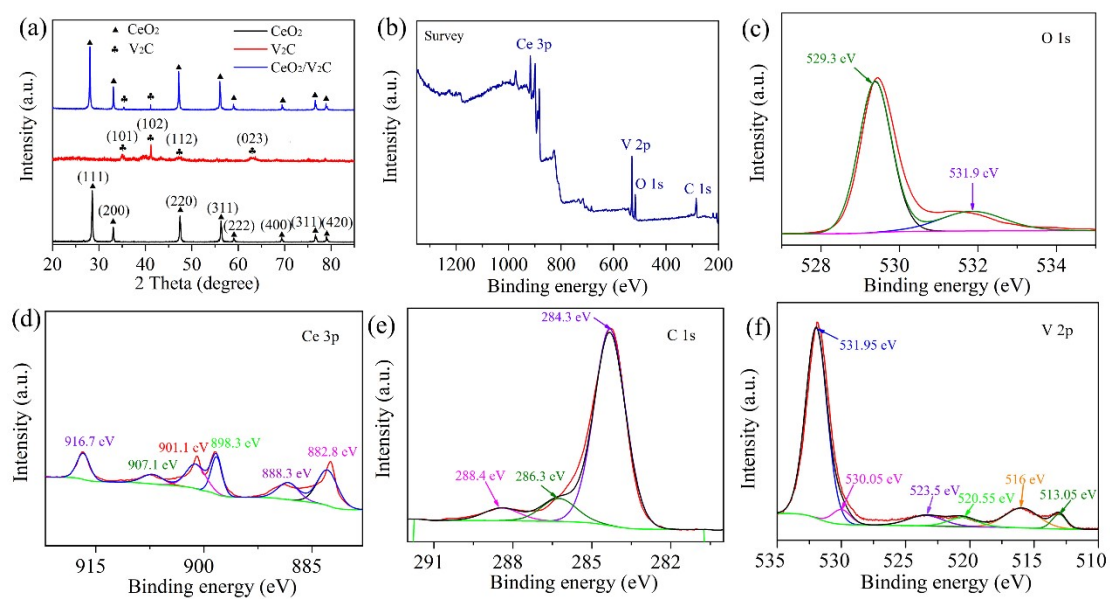

**Figure S1.** (a) XRD pattern of V<sub>2</sub>C, CeO<sub>2</sub> and CeO<sub>2</sub>/V<sub>2</sub>C samples. XPS spectra of CeO<sub>2</sub>/V<sub>2</sub>C nanohybrid: (b) Survey spectrum, (c) O 1s spectrum, (d) Ce 3p spectrum, (e) C 1s spectrum, (f) V 2p spectrum.

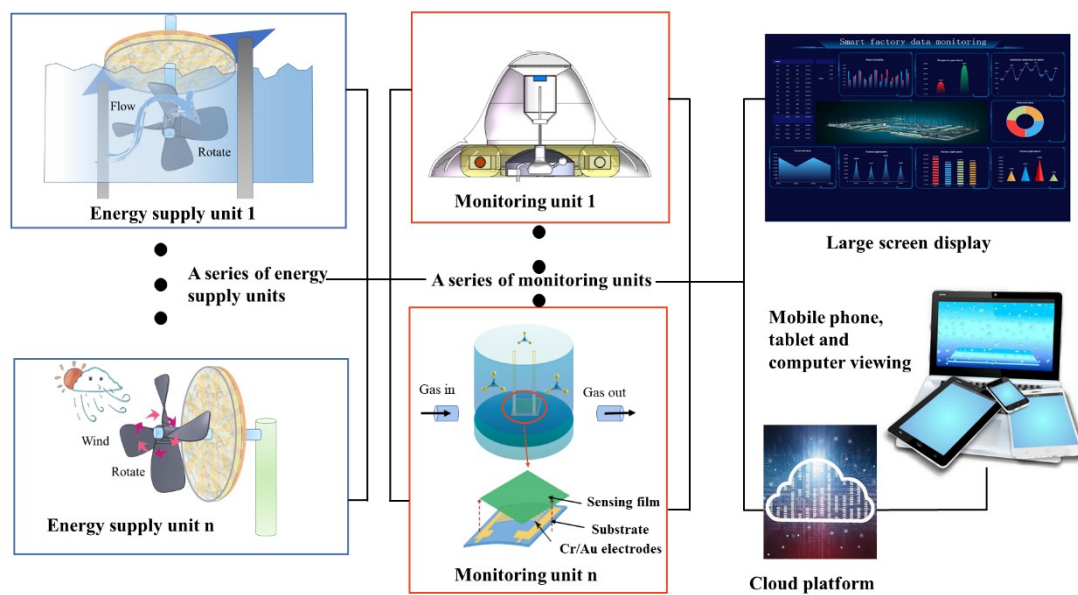

**Figure S2.** Gas sensor performance test platform.

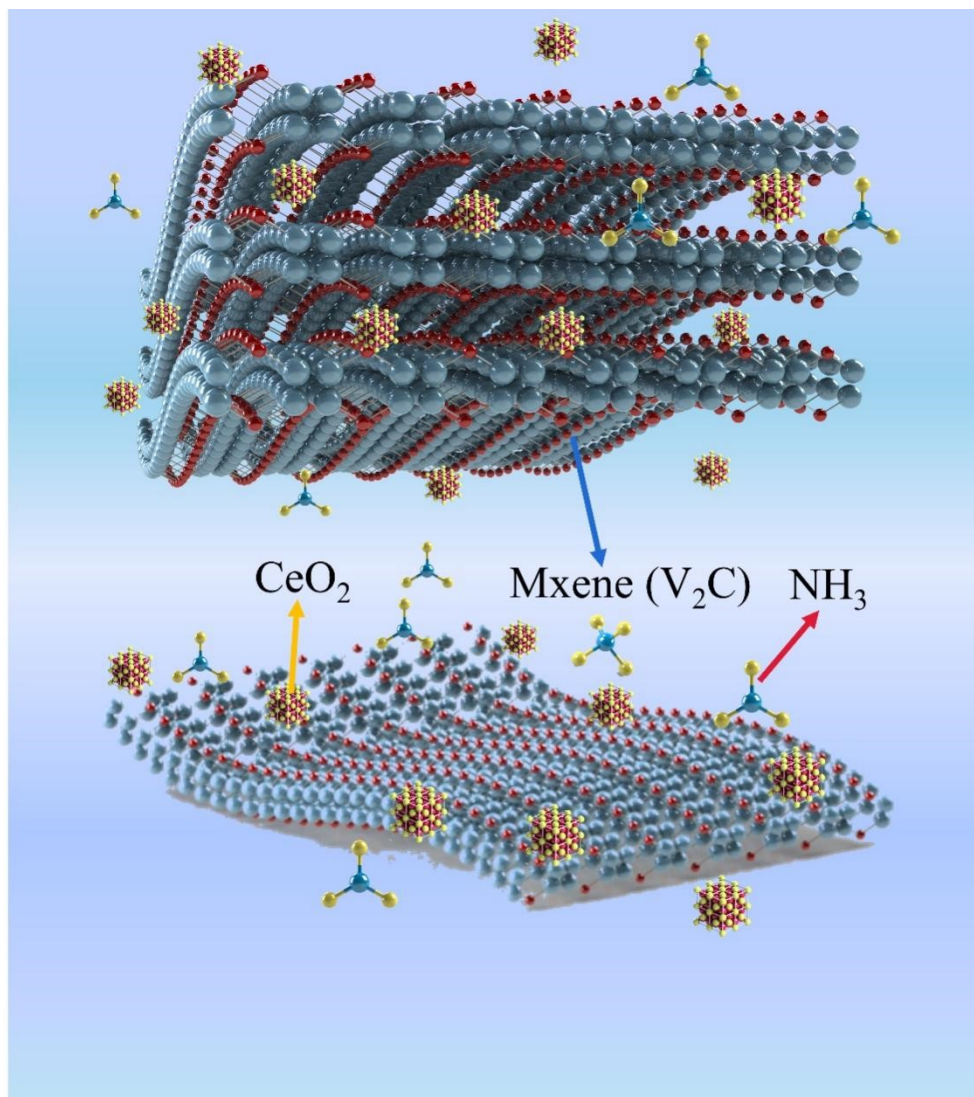

**Figure S3.** Schematic diagram of ammonia sensing mechanism of CeO<sub>2</sub>/MXene composite.

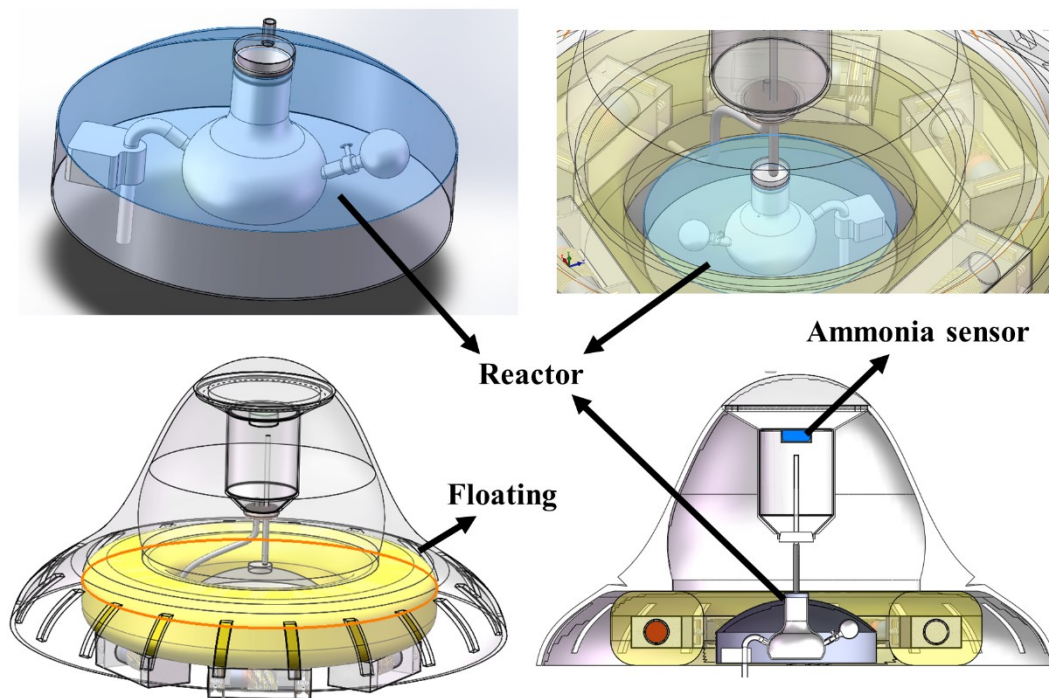

**Fig. S4.** Modeling diagram of water ammonia monitoring device.

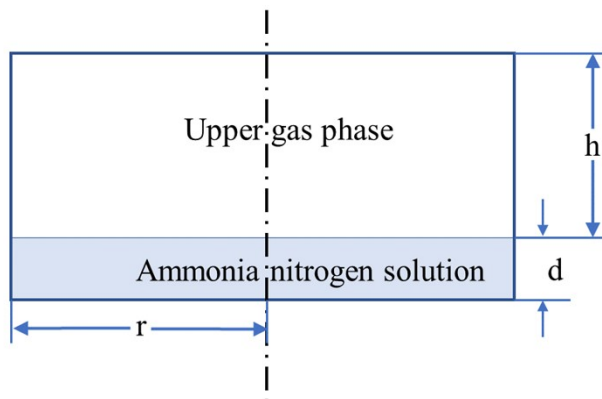

**Fig. S5.** Schematic diagram of gas-liquid distribution model for ammonia nitrogen concentration detection in water.

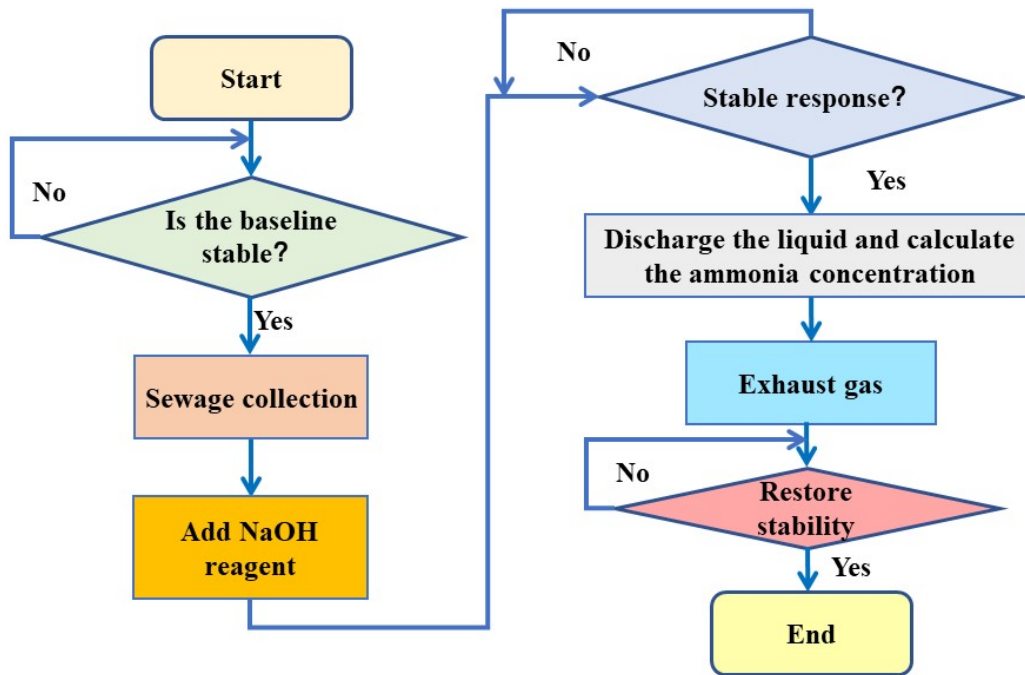

**Fig. S6.** Flow chart of single water ammonia nitrogen concentration detection process.

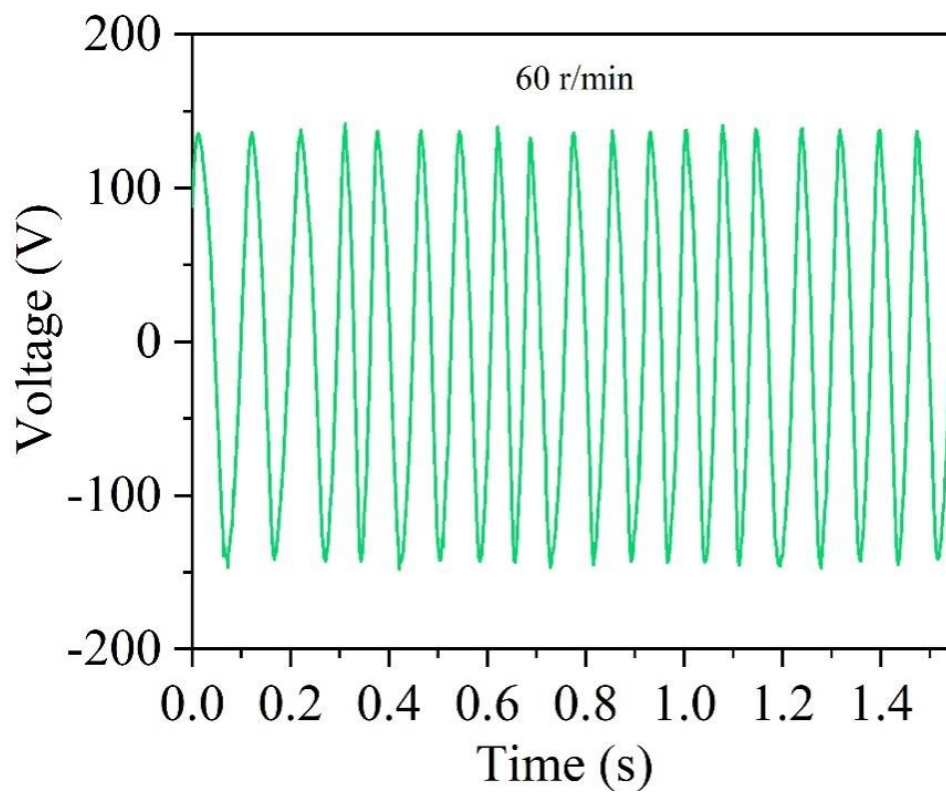

**Fig. S7.** Curve of open circuit voltage versus time at 60 r/min.



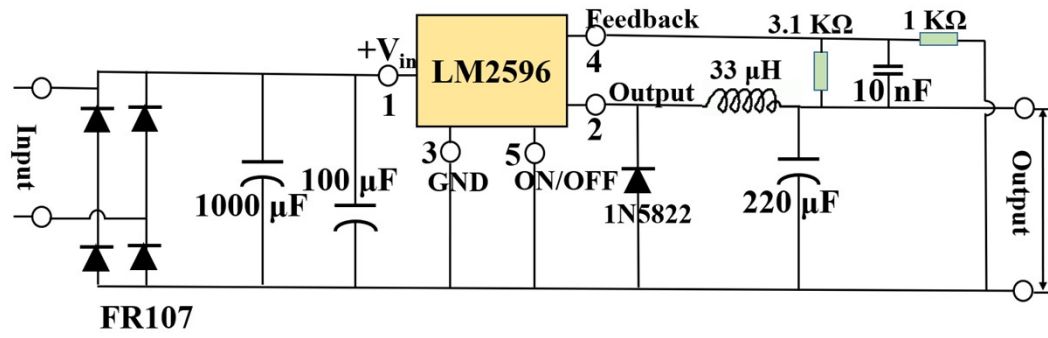

**Fig. S8.** Schematic diagram of voltage stabilizing circuit.

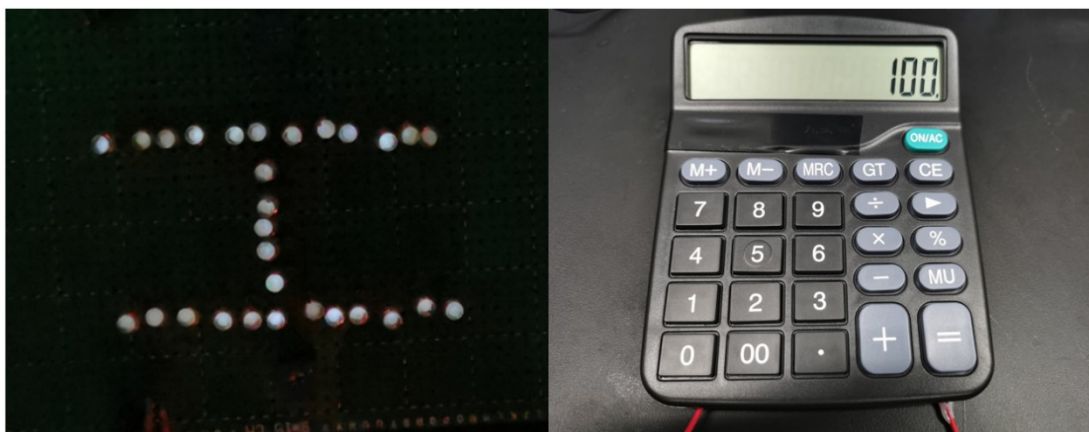

**Fig. S9.** TENG lights up the LED and the calculator.

**Table S1** Response value, response time and recovery time of the presented NH<sub>3</sub> sensors in this work.

| <b>Sensing material</b>      | <b>Sensor response (%)</b><br>50 ppb | <b>Response time T<sub>res</sub> (s)</b><br>50 ppb | <b>Recovery time T<sub>rec</sub> (s)</b><br>50 ppb |
|------------------------------|--------------------------------------|----------------------------------------------------|----------------------------------------------------|
| <b>CeO<sub>2</sub></b>       | 23.1                                 | 14                                                 | 22                                                 |
| <b>CeO<sub>2</sub>/MXene</b> | 36.8                                 | 12                                                 | 19                                                 |

**Table S2** Performance comparison of the presented sensor in this work with the previous reported NH<sub>3</sub> sensors.

| Sensing material                                                                | Detection limit (ppm) | Conc. (ppm) | (Response (%)) | T <sub>res</sub> (s) | T <sub>rec</sub> (s) | Ref.      |
|---------------------------------------------------------------------------------|-----------------------|-------------|----------------|----------------------|----------------------|-----------|
| <b>MXene/CuO</b>                                                                | 1                     | 100         | 24.8           | 43                   | 26                   | [1]       |
| <b>SnS<sub>2</sub>/Ni</b>                                                       | 10                    | 180         | 14.7           | 40.6                 | 33.7                 | [2]       |
| <b>CNTs/PPy</b>                                                                 | 0.2                   | 5           | 20             | 90                   | 450                  | [3]       |
| <b>Ti<sub>3</sub>C<sub>2</sub>T<sub>x</sub>/TiO<sub>2</sub>/MoS<sub>2</sub></b> | 0.5                   | 100         | 163.3          | 117                  | 88                   | [4]       |
| <b>MWCNTs/PANI</b>                                                              | 33                    | 50          | 117            | 47                   | -                    | [5]       |
| <b>Ti<sub>3</sub>C<sub>2</sub>T<sub>x</sub>/SnO<sub>2</sub></b>                 | 0.5                   | 50          | 40             | 36                   | 44                   | [6]       |
| <b>S-rGO/WS<sub>2</sub></b>                                                     | 10                    | 10          | 250            | 60                   | 300                  | [7]       |
| <b>BP/TiO<sub>2</sub></b>                                                       | 5                     | 5           | 19.7           | 412                  | 690                  | [8]       |
| <b>MCNT/PPy</b>                                                                 | 0.05                  | 50          | 26             | 11.7                 | 91.8                 | [9]       |
| <b>Sb-WO<sub>3</sub></b>                                                        | 0.2                   | 5           | 122            | -                    | 320                  | [10]      |
| <b>Ti<sub>3</sub>C<sub>2</sub>T<sub>x</sub>/SnO</b>                             | 1                     | 10          | 67             | 61                   | 119                  | [11]      |
| <b>CeO<sub>2</sub>/V<sub>2</sub>C</b>                                           | 0.025                 | 0.05        | 782.4          | 12                   | 19                   | This work |

## References

- [1] D. Wang, D. Zhang, Y. Yang, Q. Mi, J. Zhang, L. Yu, *ACS Nano* **2021**, 15, 2911-2919.
- [2] B. Das, S. Behera, B. Satpati, R. Ghosh, *J. Hazard. Mater.* **2022**, 28252.
- [3] J. Chang, C. Zhu, Z. Wang, Y. Wang, C. Li, Q. Hu, R. Xu, T. Du, M. Xu, L. Feng, *Nano Energy* **2022**, 98, 107271.
- [4] X. Tian, L. Yao, X. Cui, R. Zhao, T. Chen, X. Xiao, Y. Wang, *J. Mater. Chem. A* **2022**, 10, 5505-5519.
- [5] J. Ma, H. Fan, Z. Li, Y. Jia, A. K. Yadav, G. Dong, W. Wang, W. Dong, S. Wang, *Sens. Actuators B* **2021**, 334, 129677.
- [6] T. He, W. Liu, T. Lv, M. Ma, Z. Liu, A. Vasiliev, X. Li, *Sens. Actuators B* **2021**, 329, 129275.
- [7] X. Wang, B. Huang, X. Wu, D. Gu, X. Li, *Sens. Actuators B* **2021**, 337, 129776.
- [8] Y. Wang, Y. Zhou, Y. Wang, R. Zhang, J. Li, X. Li, Z. Zang, *Sens. Actuators B* **2021**, 349, 130770.
- [9] S. Gai, B. Wang, X. Wang, R. Zhang, S. Miao, Y. Wu, *Sens. Actuators B* **2021**, 131352.
- [10] G. Yao, J. Yu, H. Wu, Z. Li, W. Zou, H. Zhu, Z. Huang, H. Huang, Z. Tang, *Sens. Actuators B* **2022**, 131365.
- [11] L. Yao, X. Tian, X. Cui, R. Zhao, M. Xiao, B. Wang, X. Xiao, Y. Wang, *Sens. Actuators B* **2022**, 358, 131501.
